# Supplementary material for: Targeted assemblies of cas1 suggest CRISPR-Cas’s response to soil warming
Source: PubMed Central journal article supplement (PMC7305122; doi:10.1038/s41396-020-0635-1), 2020-03-27

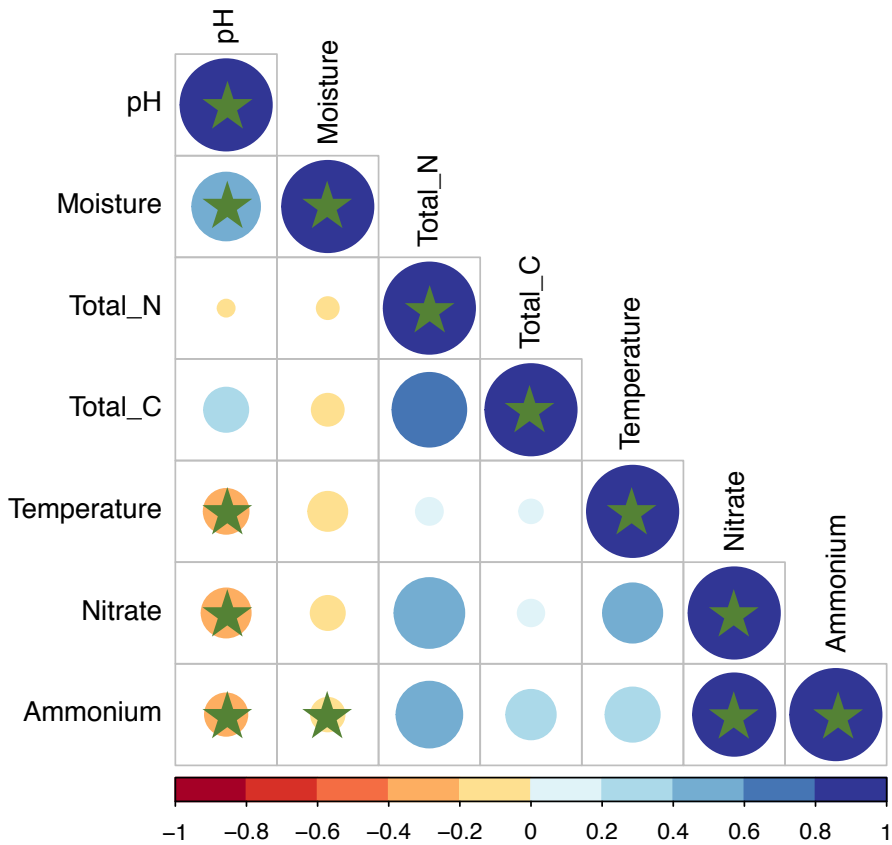

Supplement: 41396_2020_635_MOESM6_ESM.pdf [file 41396_2020_635_MOESM6_ESM.pdf]
